# Supplementary material
Source: PubMed Central journal article supplement (PMC2914142)
Supplement: NIHMS210768-supplement-1_si_001.pdf [file NIHMS210768-supplement-1_si_001.pdf]

## Supplementary Material

### **A Targeted Nanoglobular Manganese(II) Chelate Conjugate for Magnetic Resonance Molecular Imaging of Tumor Stroma**

Mingqian Tan,<sup>1</sup> Xueming Wu,<sup>1</sup> Eun-Kee Jeong,<sup>2</sup> Dennis L. Parker<sup>2</sup>, Qianjin Chen,<sup>3</sup> Zheng-Rong Lu<sup>1\*</sup>

<sup>1</sup>*Department of Biomedical Engineering, Case Western Reserve University, Cleveland, OH 44106,*

<sup>2</sup>*Department of Radiology, University of Utah, Salt Lake City, UT 84108,*

<sup>3</sup>*Department of Chemistry, The Chinese University of Hong Kong, Hong Kong*

## Experimental Section

### Scheme S1: Synthesis of CLT1 peptide targeted nanoglobular Mn(II) chelate (P-G3-Mn)

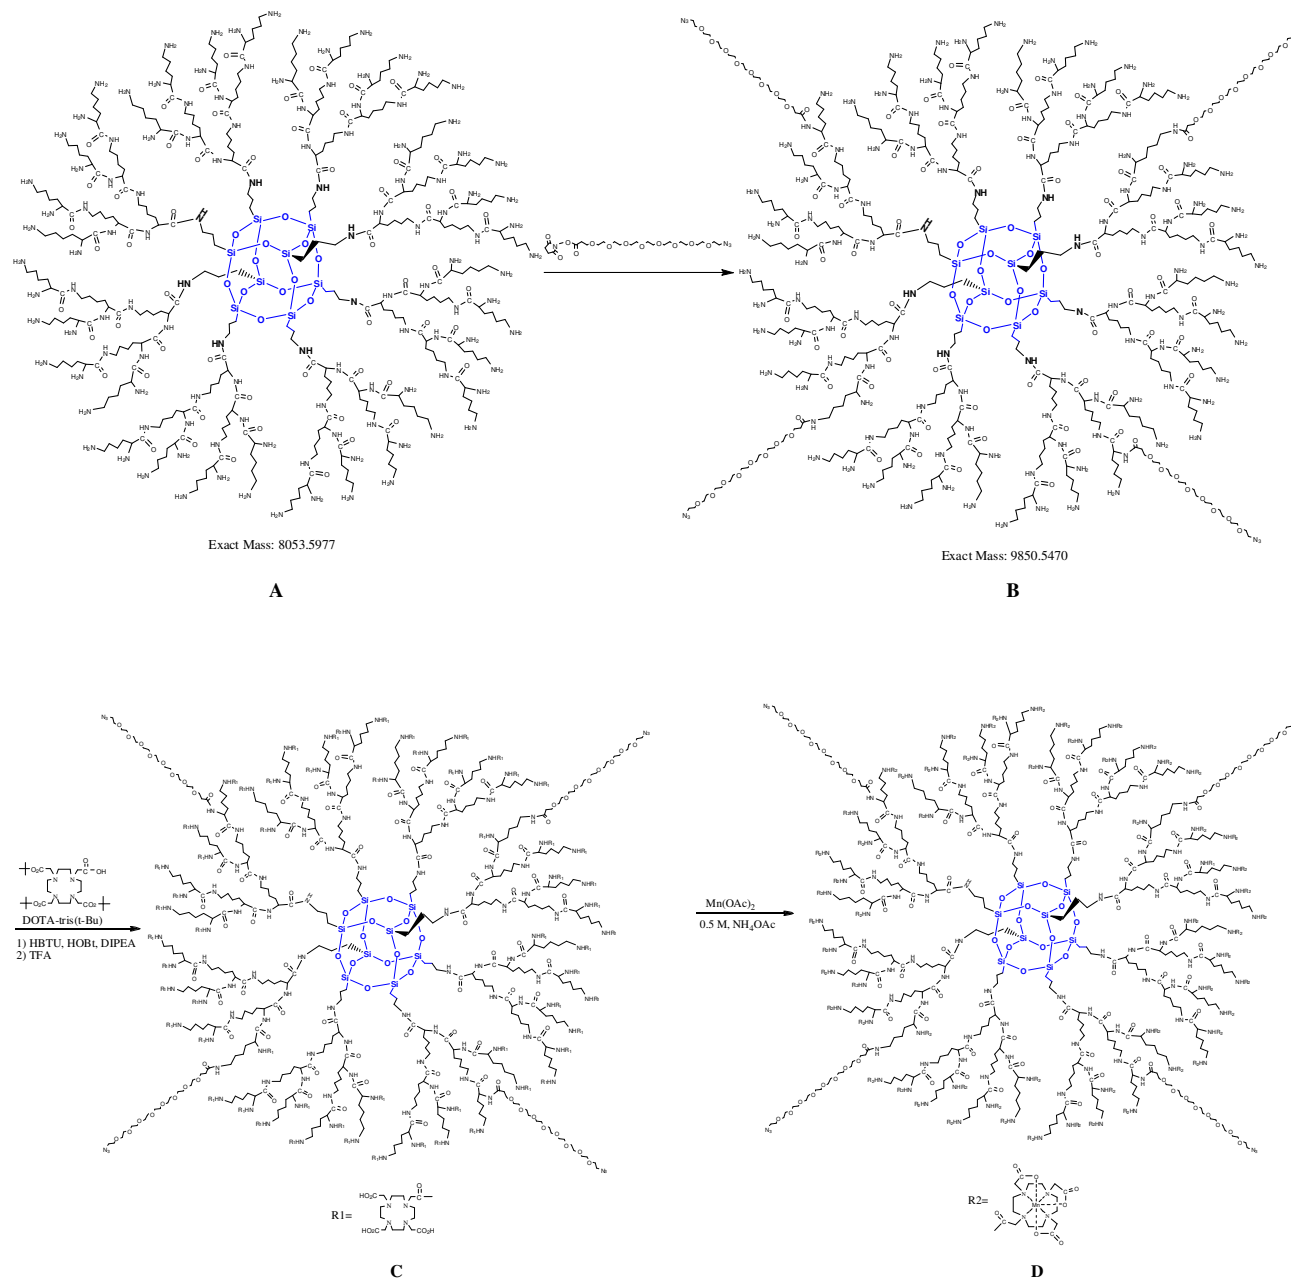

- A:** Generation 3 (G3) nanoglobule with an OAS core
- B:** G3 nanoglobule-PEG-azido conjugate
- C:** G3 nanoglobule-DOTA-PEG-azido conjugate
- D:** G3 nanoglobule-Mn-DOTA-PEG-azido conjugate

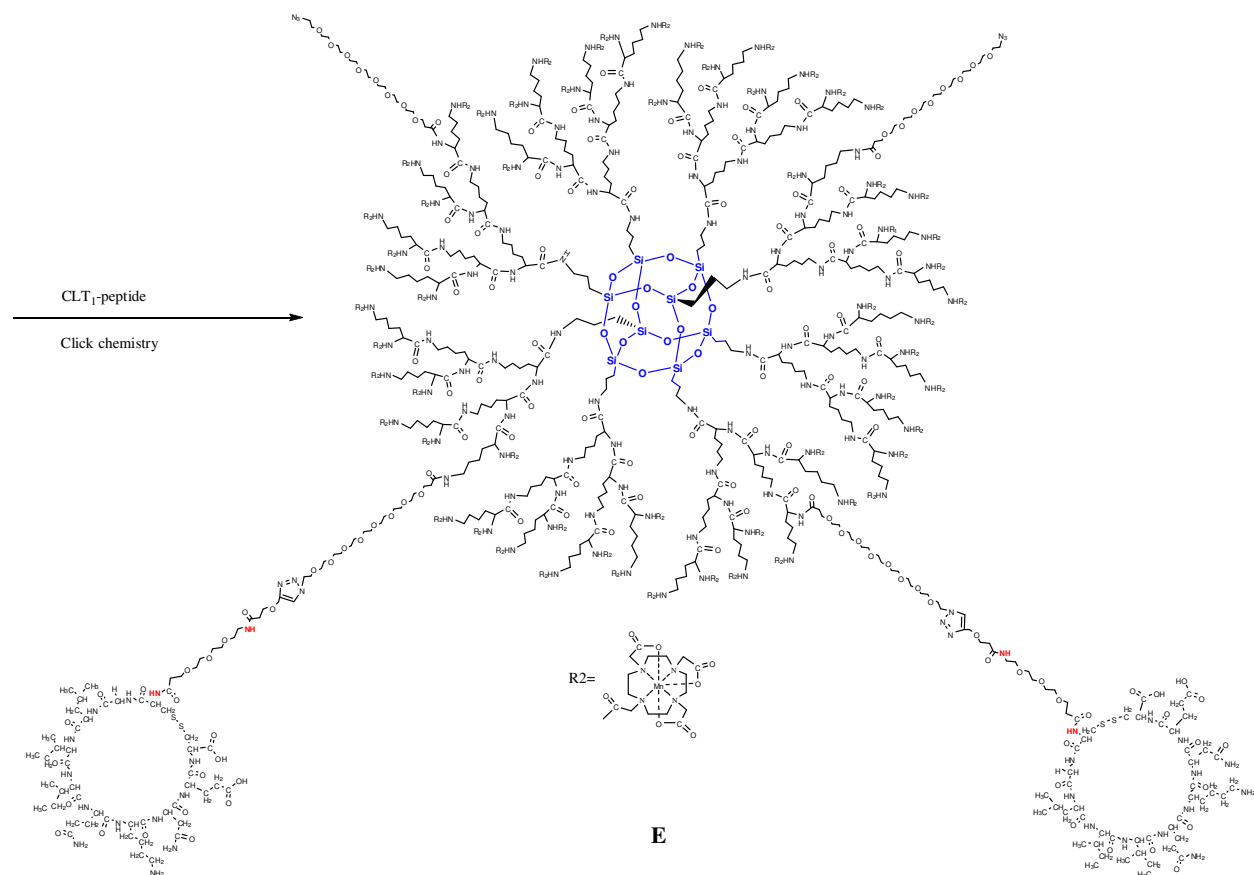

**E:** CLT<sub>1</sub> peptide targeted nanoglobular Mn(II) chelate contrast agent (P-G3-Mn)

**Scheme S2: Synthesis of non-targeted nanoglobular Mn(II) chelate (G3-Mn)**

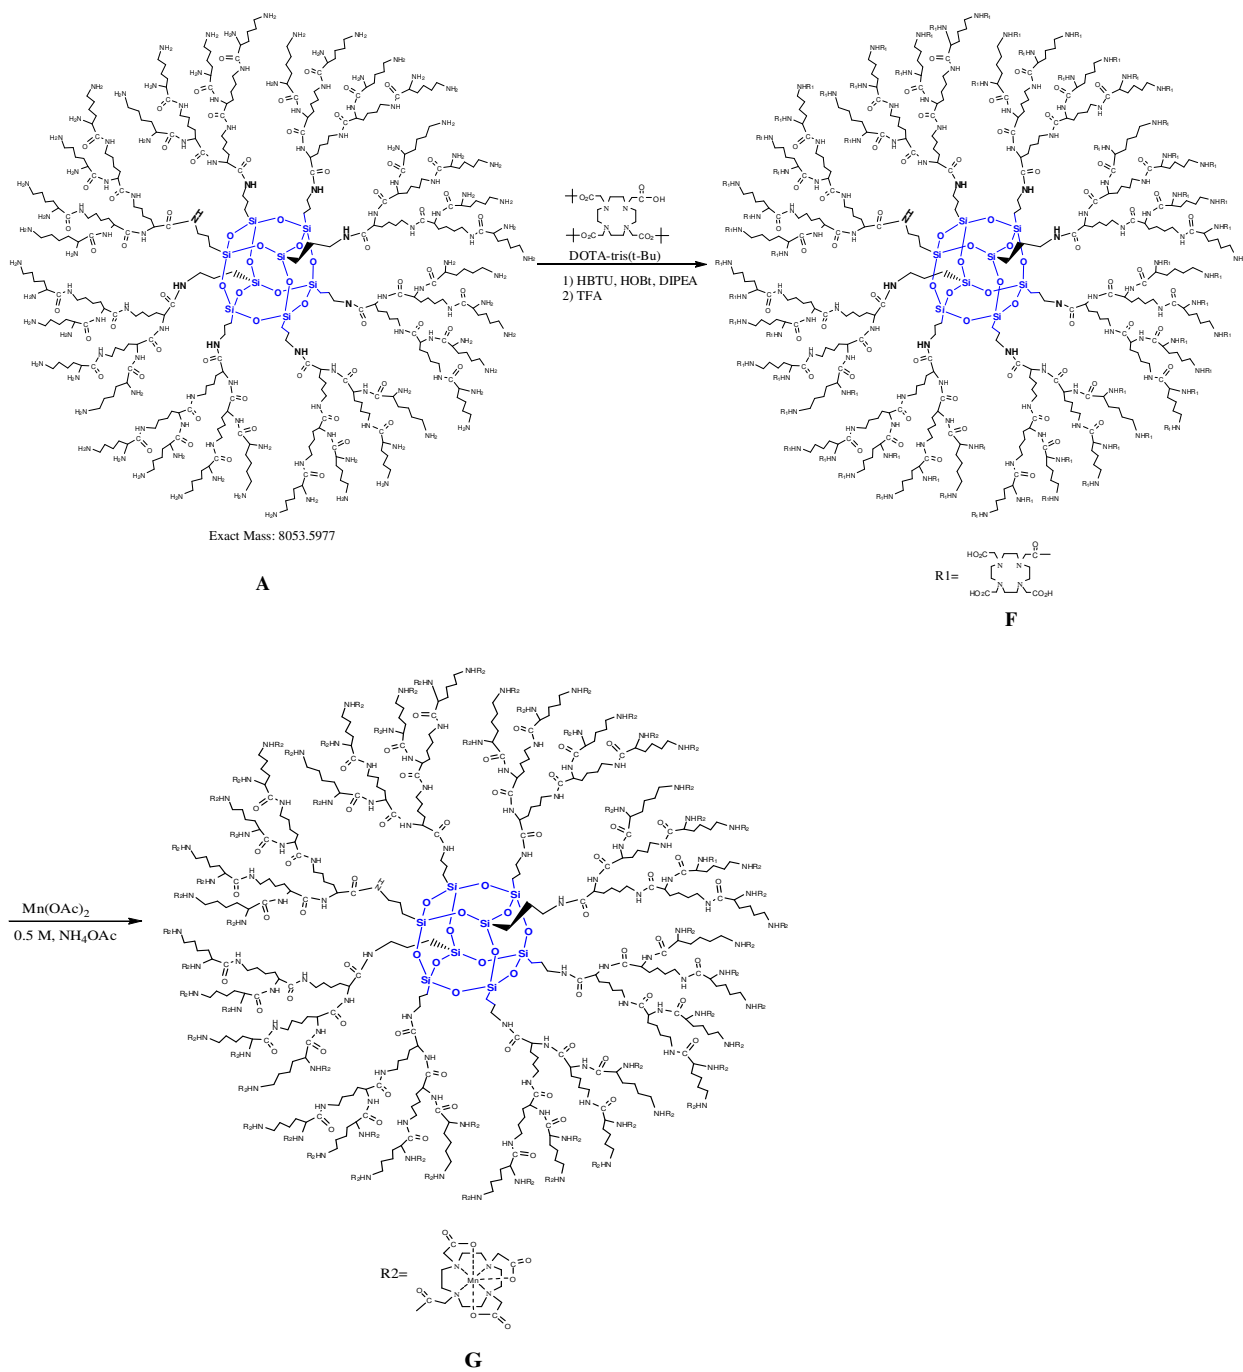

- A:** G3 nanoglobule with an OAS core  
**F:** G3 nanoglobule-DOTA conjugate  
**G:** Non-targeted nanoglobular Mn(II) chelate contrast agent

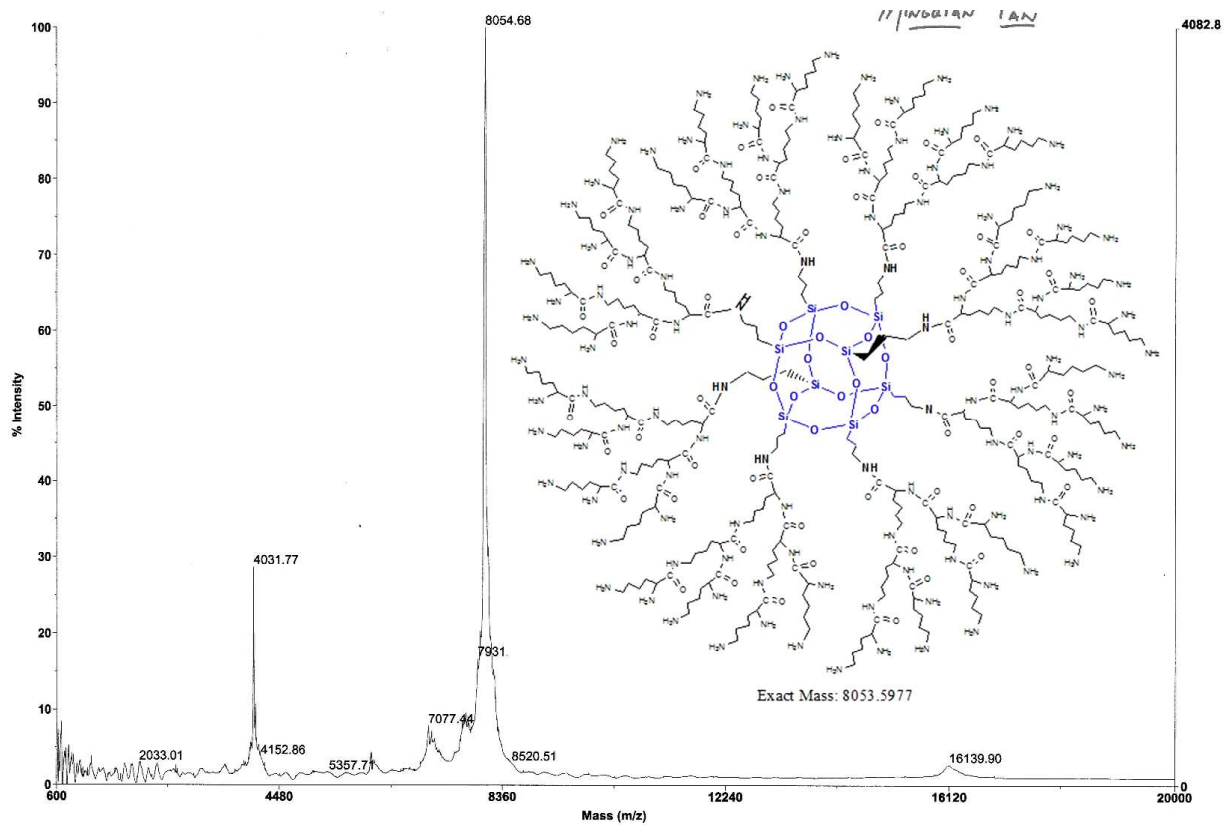

**Figure S1.** MALDI-TOF mass spectrum of G3 nanoglobule. Insert shows its structure.

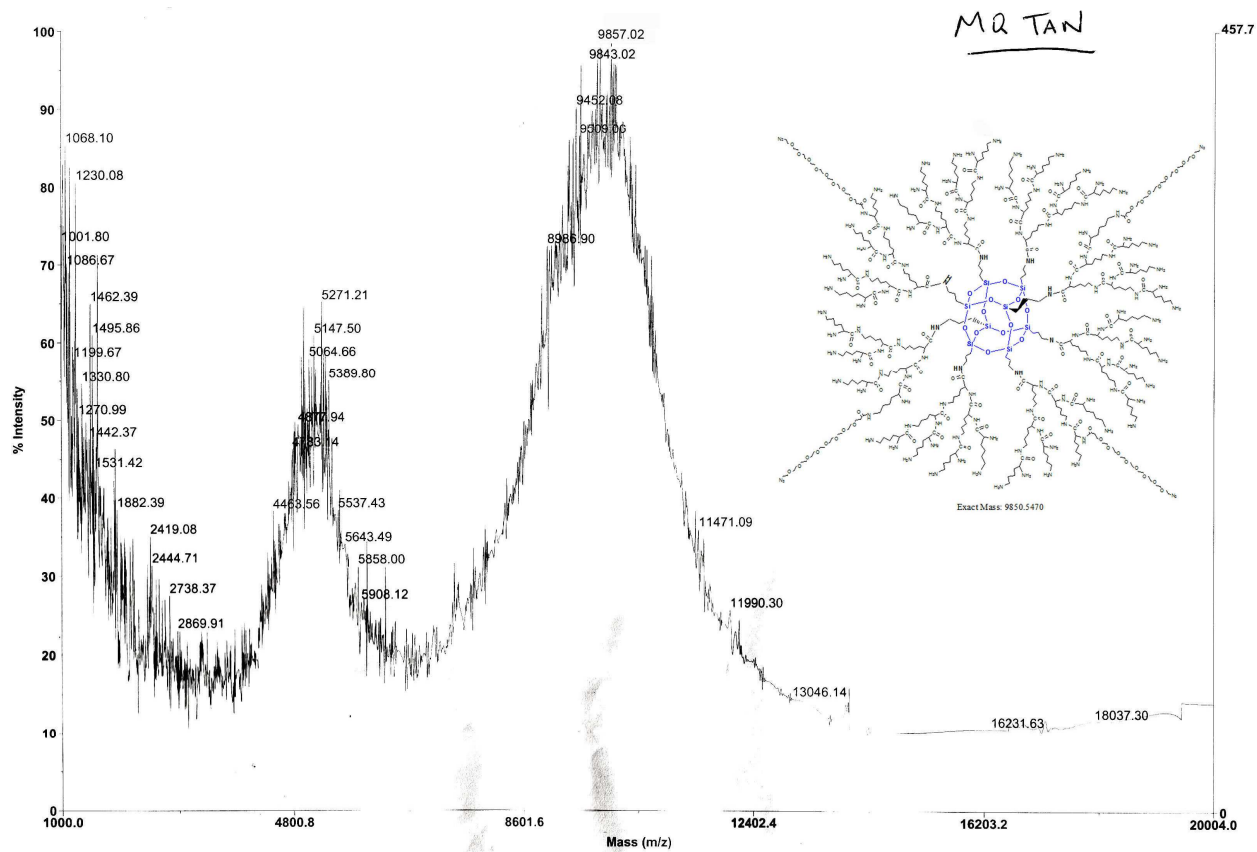

**Figure S2.** MALDI-TOF mass spectrum of G3 nanoglobule-PEG-azido conjugate. Insert shows its structure.

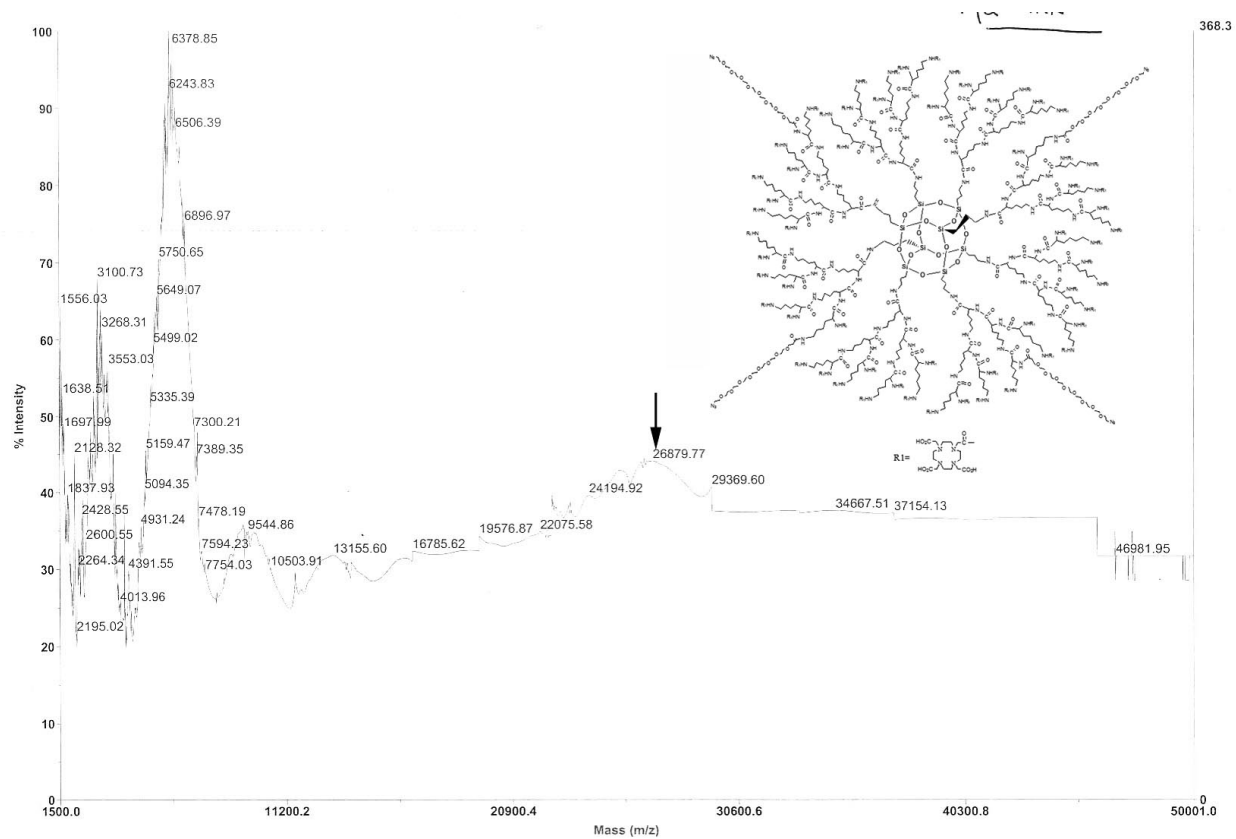

**Figure S3.** MALDI-TOF mass spectrum of the G3 nanoglobule-DOTA-PEG-azido conjugate.

Insert shows its structure.

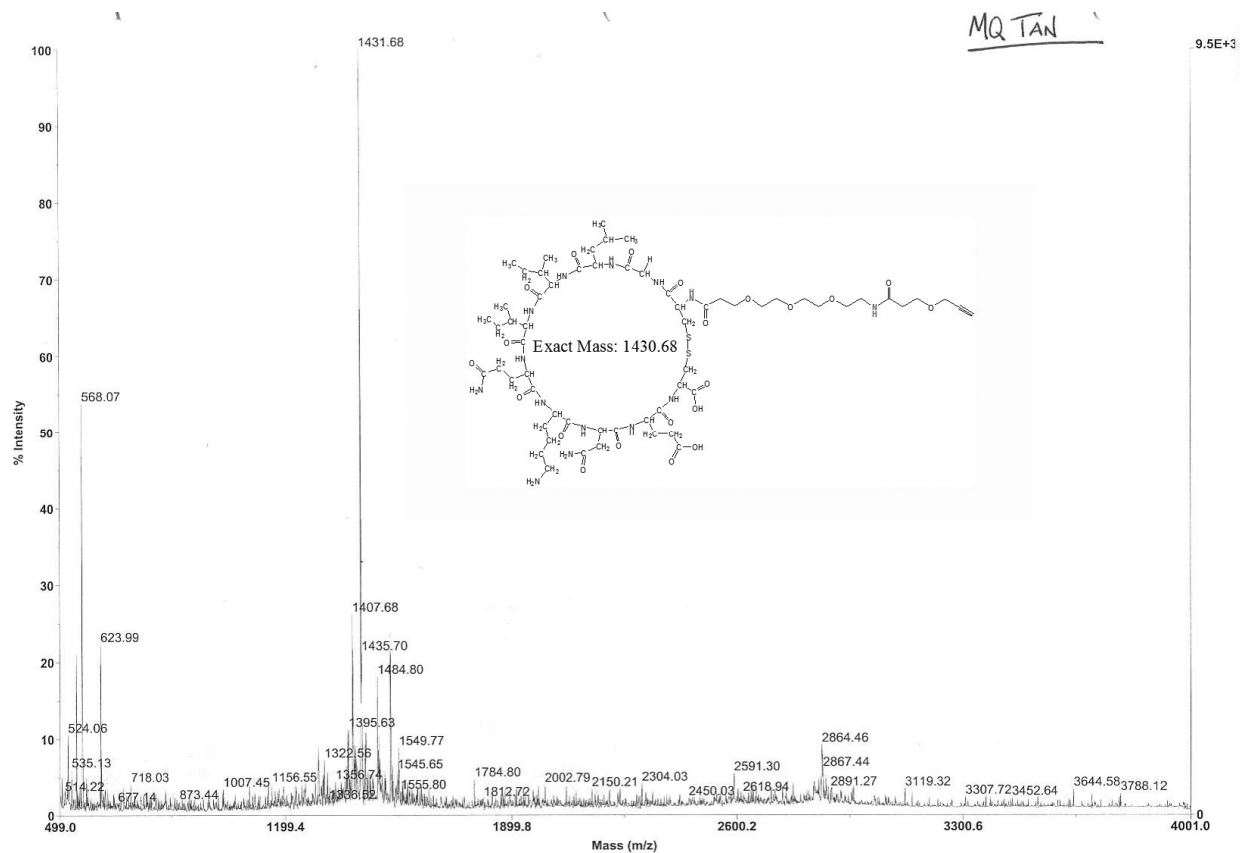

**Figure S4.** MALDI-TOF mass spectrum of CLT1 peptide PEG-propargyl conjugate. Insert shows its structure.



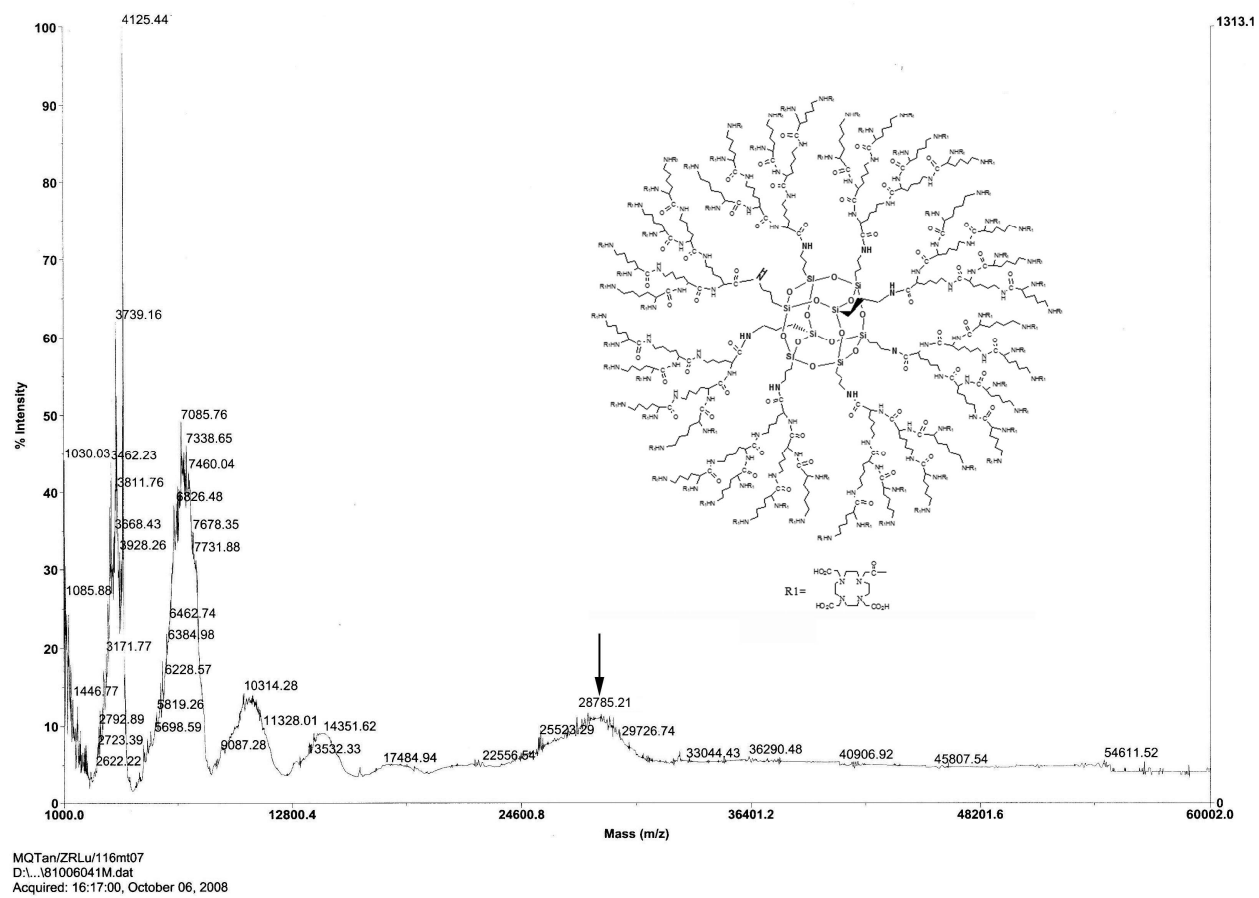

**Figure S5.** MALDI-TOF mass spectrum of G3 nanoglobule-DOTA conjugate. Insert shows its structure.

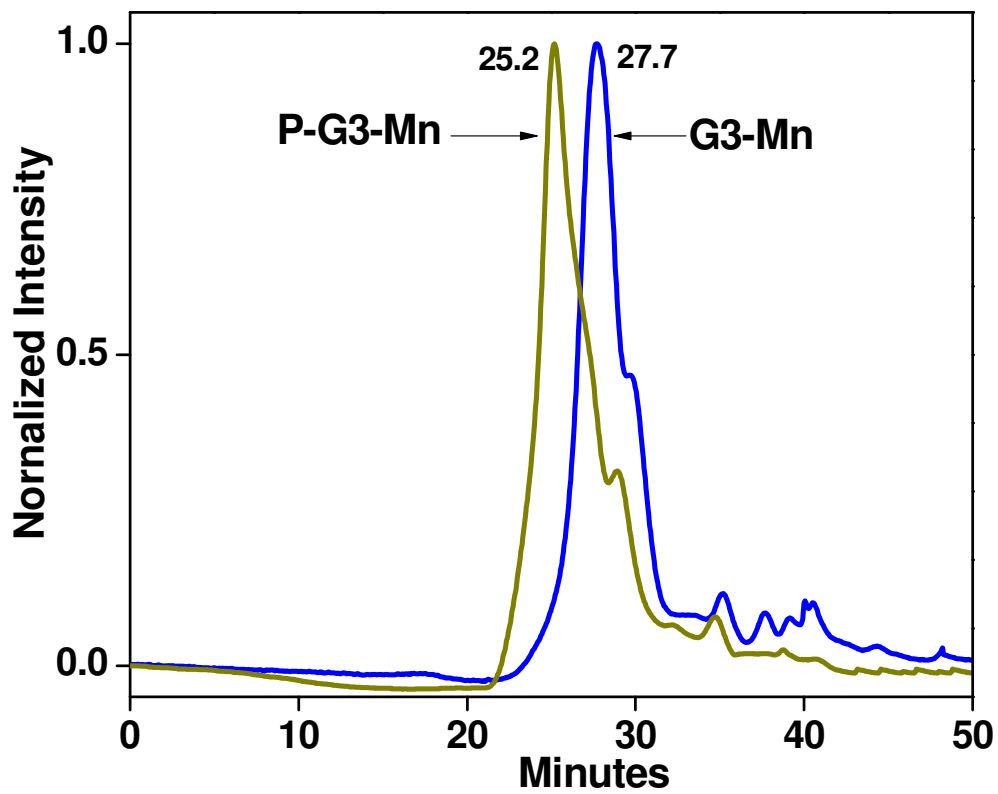

**Figure S6.** Size-exclusion HPLC chromatograms of targeted (P-G3-Mn) and non-targeted (G3-Mn) nanoglobular Mn(II) chelate contrast agent

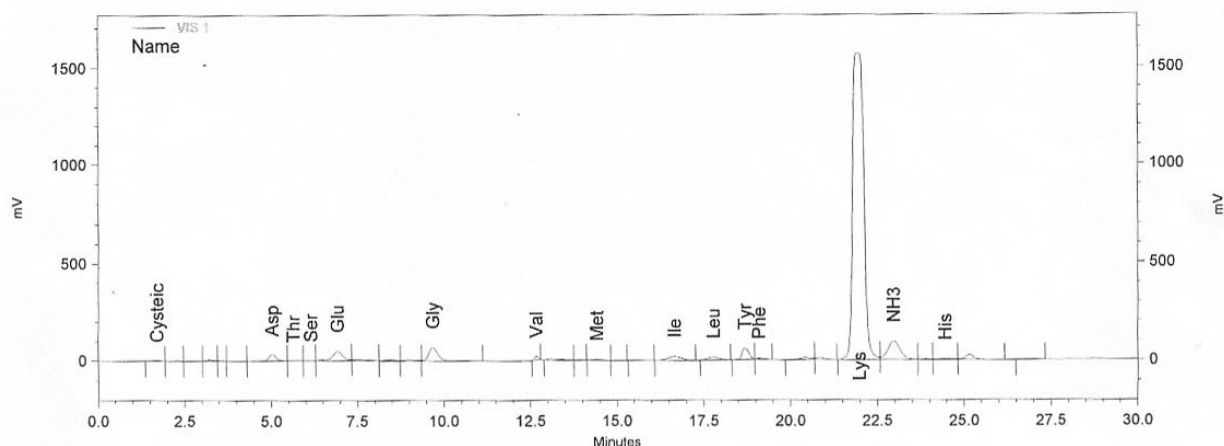

**Figure S7.** Amino acid analysis of targeted nanoglobular Mn(II) chelate contrast agent (P-G3-Mn)

**Table S1.** Amino acid analysis of targeted nanoglobular Mn(II) chelate contrast agent (P-G3-Mn)

| Peak | Retention time (min) | Amino acid Name | Area      | Total nmol per sample |
|------|----------------------|-----------------|-----------|-----------------------|
| 1    | 1.703                | Cys (C)         | 191594    | 0.409                 |
| 2    | 5.023                | Asp (D)         | 1874065   | 4.782                 |
| 3    | 6.923                | Glu (E)         | 4212284   | 11.514                |
| 4    | 9.683                | Gly (G)         | 5017285   | 11.234                |
| 5    | 12.663               | Val (V)         | 564905    | 4.533                 |
| 6    | 16.673               | Ile (I)         | 2137764   | 5.526                 |
| 7    | 17.787               | Leu (L)         | 1382040   | 3.582                 |
| 8    | 18.683               | Tyr (Y)         | 3004913   | 7.451                 |
| 9    | 21.973               | Lys(K)          | 138658768 | 303.245               |
| 10   | 22.973               | NH <sub>3</sub> | 9369929   | 44.902                |

**Peptide CLT1: CGLIIQKNEC**

**Table S2.** Elemental analysis results of nanoglobular agents with inductively coupled plasma-optical emission spectroscopy (ICP-OES)

|         | Amount of sample (mg) | solution (g) | Mn (ppm) | S (ppm) | Cu (ppm) | Mn (wt.%) | S (wt.%) | Cu (wt.%) |
|---------|-----------------------|--------------|----------|---------|----------|-----------|----------|-----------|
| P-G3-Mn | 0.70                  | 5.004        | 9.99     | 0.505   | 0.27     | 7.14      | 0.361    | 0.19      |
| P-G3-Mn | 1.42                  | 7.972        | 12.90    | 0.643   | 0.37     | 7.29      | 0.360    | 0.21      |
| Average |                       |              |          |         |          | 7.20      | 0.3605   | 0.20      |
| G3-Mn   | 1.38                  | 9.223        | 13.49    |         |          | 9.01      |          |           |
| G3-Mn   | 2.54                  | 11.236       | 21.31    |         |          | 9.77      |          |           |
| Average |                       |              |          |         |          | 9.39      |          |           |
